# Supplementary material for: N6-methyladenosine-modified circRPS6KC1 regulated cell senescence in prostate cancer via FOXM1/PCNA axis
Source: Research Square preprint supplement (doi:10.21203/rs.3.rs-4541473/v1), 2024-06-21

Supplementary Table S1 The sequences of siRNA or shRNA

| si-circRPS6KC1#1 | GGTGTTCAAGGGTGGAATA |
| --- | --- |
| si-circRPS6KC1#2 | TAGAAGGTGTTCAAGGGTG |
| sh-circRPS6KC1 | TAGAAGGTGTTCAAGGGTG |
| siMETTL3#1 | CCUGCAAGUAUGUUCACUA |
| siMETTL3#2 | GCUACCUGGACGUCAGUAU |
| sh-METTL3 | CCUGCAAGUAUGUUCACUA |
| siYTHDF1#1 | GCACTGACTGGTGTCCTTT |
| siYTHDF1#2 | ACGGCAGAGTCGAAACAAA |
| siFOXM1#1 | CCAACAATGCTAATATTCA |
| siFOXM1#2 | GGACCACUUUCCCUACUUU |

Supplementary Table S2 The sequences of PCR primers

| circRPS6KC1-F | AATCGACCGCACAGAGCTCA |
| --- | --- |
| circRPS6KC1-R | GGTCCAGGGAGGTCCTCAAG |
| circRPS6KC1-convergent-F | AGCTCACTCAGATTCCCTCA |
| circRPS6KC1-convergent-R | GCCCCTAGTGCTGAAGAATC |
| METTL3-F | CCAGCTATGCTTCAGATCGCCT |
| METTL3-R | GGTTCTCTTCCTTGTCCATCTCC |
| YTHDF1-F | ACCTGTCCAGCTATTACCCG |
| YTHDF1-R | TGGTGAGGTATGGAATCGGAG |
| FOXM1-F | TGCAGCTAGGGATGTGAATCTTC |
| FOXM1-R | GGAGCCCAGTCCATCAGAACT |
| RPS6KC1-F | TCTTACCGGGAGCGGAGT |
| RPS6KC1-R | TCTCTTCCATACAATTATCTCCTGG |
| GAPDH-convergent-F | GCCGTCTAGAAAAACCTGCC |
| GAPDH-convergent-R | CCACCTGGTGCTCAGTGTAG |
| GAPDH-divergent-F | CGACCACTTTGTCAAGCTCA |
| GAPDH-divergent-R | GACCTTCACCTTCCCCATTT |
| β-actin-F | CATGTACGTTGCTATCCAGGC |
| β-actin-R | CTCCTTAATGTCACGCACGAT |
| CDKN1A-F | AGTCAGTTCCTTGTGGAGCC |
| CDKN1A-R | CATTAGCGCATCACAGTCGC |
| PCNA-F | CCTGCTGGGATATTAGCTCCA |
| PCNA-R | CAGCGGTAGGTGTCGAAGC |
| circRPS6KC1-MeRIP-F | GATTCTTCAGCACTAGGGGC |
| circRPS6KC1-MeRIP-R | CCAGGAAAGAGGCTACGACT |
| PCNA-ChIP-binding site 1-F | AGCCTGGGTGTCAAAGGG |
| PCNA-ChIP-binding site 1-R | AAAAGGGAACAGGAAAGGGC |
| PCNA-ChIP-binding site 2-F | TGCCTAAGTGCTCAAAGGTGT |
| PCNA-ChIP-binding site 2-R | GCACTCATTCCGTAAACACTTGG |
| hsa-miR-4778-3p-F | TCTTCTTCCTTTGCAGAGTTGA |
| hsa-miR-4786-3p-F | TGAAGCCAGCTCTGGTCTGGGC |
| hsa-miR-4659a-3p-F | TTTCTTCTTAGACATGGCAACG |
| hsa-miR-4659b-3p-F | TTTCTTCTTAGACATGGCAGCT |
| hsa-miR-761-F | GCAGCAGGGTGAAACTGACACA |

Supplementary Table S3 The sequence of circRPS6KC1 and NC probes

| circRPS6KC1 probe | TATTCCACCCTTGAACACCTTCTAGG |
| --- | --- |
| NC probe | CCTAGAAGGTGTTCAAGGGTGGAATA |

Supplemental Fig. 1 The sequence and SRAMP predicting results of hsa_circ_0001583 and hsa_circ_0001584

> hsa_circ_0001583

GTTAAAAAGGCGGGCGGAACCAAACCTAAGAAGCCAGTTGGGGCAGCCAAGAAGCCCAAGAAGGCGGCTGGCGGCGCAACTCCGAAGAAGAGCGCTAAGAAAACACCGAAGAAAGCGAAGAAGCCGGCCGCGGCCACTGTAACCAAGAAAGTGGCTAAGAGCCCAAAGAAGGCCAAG


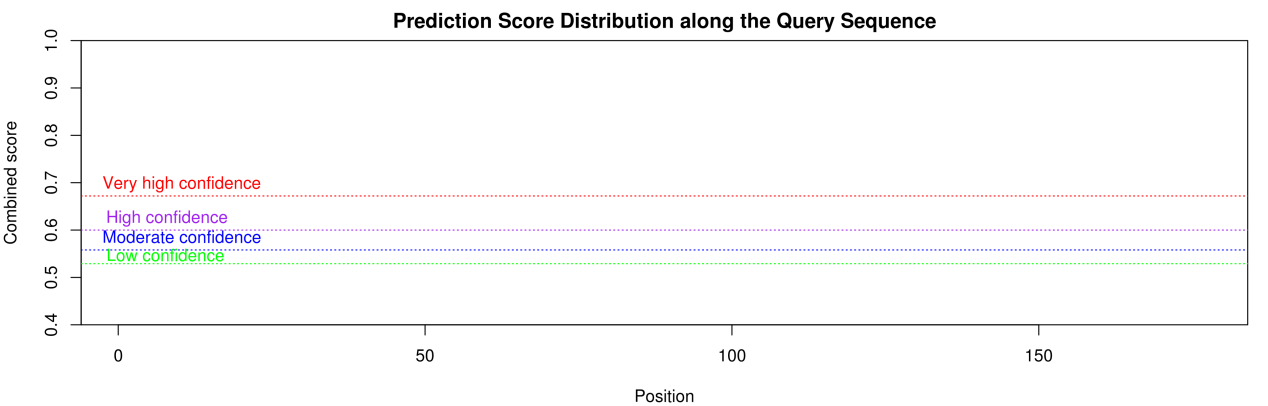


> hsa_circ_0001584

GTTTGGTTCCGCCCGCCTTTTTAACCTTGGGCTTGGCTTCCCCGGAGGCTGCCTTCTTGTTGAGTTTAAAGGAGCCAGAAGCACCGGTGCCTTTCGTTTGCACCAGAGTGCCCTTGCTCACCAGGCTCTTGAGACCAA


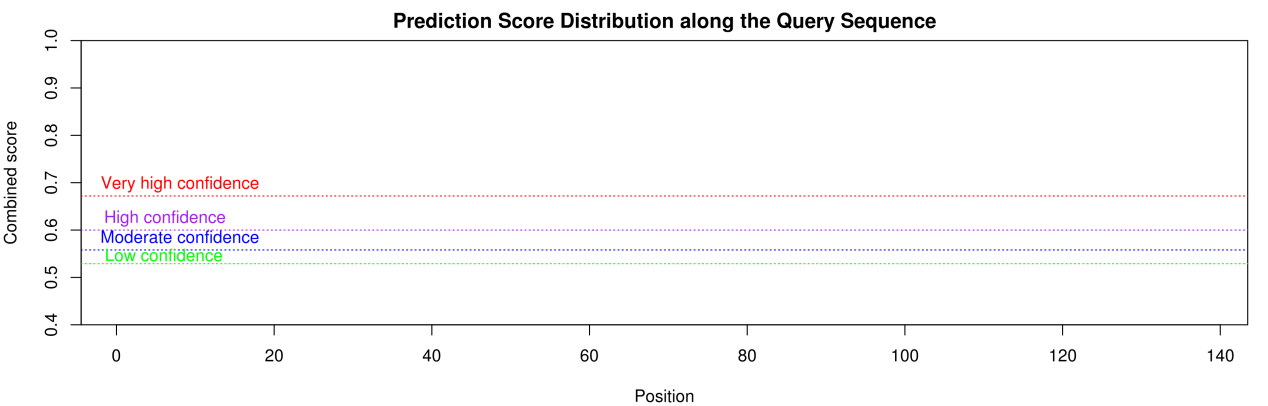

Supplement: Supplementary file 1 [file 7b8bac120a794ee17439c599.docx]
